# Supplementary material for: Nanogravimetric observation of unexpected ion exchange characteristics for polypyrrole film p-doping in a deep eutectic ionic liquid
Source: Royal Society of Chemistry journal article supplement (doi:10.1039/b819084d), 2009-01-01
Supplement: b819084d.pdf [file b819084d.pdf]

Supporting information for *Chem. Comm.* manuscript B819084D

**Nanogravimetric observation of unexpected ion exchange characteristics  
for polypyrrole film p-doping in a deep eutectic ionic liquid**

Magdalena A. Skopek, Mohamoud A. Mohamoud, Karl S. Ryder and A. Robert Hillman\*

*Acoustic wave resonator and procedure for acquisition of acoustic admittance spectra*

The quartz resonators were 10 MHz AT-cut crystals coated with Au (ICM, Oklahoma City, USA), with piezoelectric and electrochemically active areas of 0.21 and 0.23 cm<sup>2</sup>. Film rigidity was established via crystal impedance spectra, using an Agilent Technologies E5061A network analyser with VEE v7.52 software. Resonator frequency changes were interpreted gravimetrically using the Sauerbrey equation<sup>13</sup>: for the quartz resonators used here,  $\Delta m/\text{ng} = -1.1(\Delta f/\text{Hz})$ . Film thickness ( $h_f$ ) was determined gravimetrically, using  $\Delta f$  for film deposition and a film density of 1 g cm<sup>-3</sup>.

*Admittance spectra*

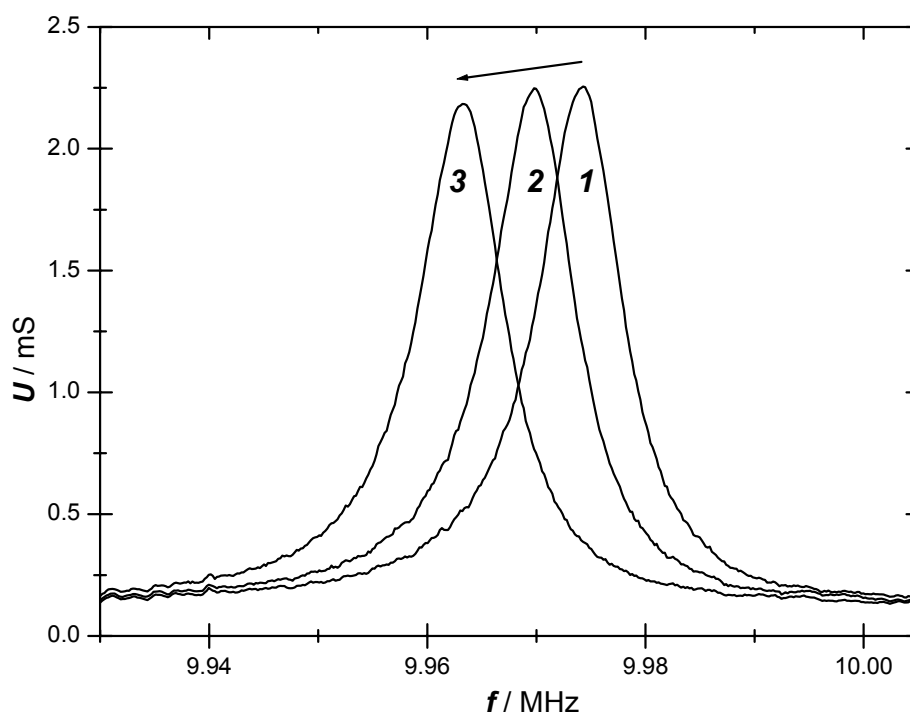

Admittance spectra acquired during deposition of a PPy film (solutions and potential control function as in main text). Trace 1: bare electrode; trace 2: after 5 deposition cycles; trace 3: after 10 deposition cycles. The overall decrease in peak admittance (from trace 1 to trace 3) is 3%; the film is acoustically thin (“rigid”).
